# Supplementary material for: The efficacy of a supervised and a home-based core strengthening programme in adults with poor core stability: a three-arm randomised controlled trial
Source: HighWire-hosted journal article supplement (doi:10.1136/bjsports-2013-093262), 2014-11-10
Supplement: bjsports-2013-093262supp1.pdf [file bjsports-2013-093262supp1.pdf]

## Supplementary file 1, The core strengthening program

| Exercises                                                             | Characteristics                                                                | Justification                                                                                                                                                                                                                                                                                                                                                                                                                    |
|-----------------------------------------------------------------------|--------------------------------------------------------------------------------|----------------------------------------------------------------------------------------------------------------------------------------------------------------------------------------------------------------------------------------------------------------------------------------------------------------------------------------------------------------------------------------------------------------------------------|
| Cat/camel                                                             | Cycles of flexion and extension in quadruped position.                         | Cat/camel reduces spinal viscosity (14).                                                                                                                                                                                                                                                                                                                                                                                         |
| Abdominal muscle contractions in supine and quadruped.<br>Side bridge | Activation of the deep core musculature in static positions.                   | The local system consists of mostly type I tonic muscles which are activated with low intensities and slow movements (15). These muscles therefore require exercises that involve little to no motion through the spine and pelvis (16). The side bridge and bird dog exercises produce muscle activation in the absence of external loading to train stabilisation and endurance to the musculature of the torso and hips (17). |
| Dead bug<br>Bird dog                                                  | Maintenance of core control while performing controlled arm and leg movements. |                                                                                                                                                                                                                                                                                                                                                                                                                                  |
| Hip abduction                                                         | Activation of the hip musculature while maintaining lumbar and pelvic control. | Hip abduction is an effective non-weight-bearing method for isolating function and strength training of the gluteus medius muscle (17).                                                                                                                                                                                                                                                                                          |
| Abdominal isometric contraction on a Swiss ball.                      | Maintenance of core control in an unstable environment.                        | Given that isolation exercises of the local musculature tend to be in non-functional positions, exercise training that shifts to additional functional positions and actions is required as a progression, which initiates training of the global system (16).                                                                                                                                                                   |
| Lunges                                                                | Maintenance of lumbar control during hip movement.                             |                                                                                                                                                                                                                                                                                                                                                                                                                                  |
| Directional lunges and oblique twists                                 | Maintenance of lumbar control during multiplanar movements.                    | Exercises that produce dynamic concentric and eccentric movement of the spine emphasise the global system musculature while providing an environment for the local system to stabilise the spine in a variety of multiplanar movements (16).                                                                                                                                                                                     |
| Trunk twists on a Swiss ball                                          | Maintenance of core control during movement in an unstable environment.        |                                                                                                                                                                                                                                                                                                                                                                                                                                  |
| Trunk twists with theraband on Swiss ball                             | Progress to movement under resistance in an unstable environment.              |                                                                                                                                                                                                                                                                                                                                                                                                                                  |

| Exercise                                                                      | Week 1                                                                 |      | Week 2                                                                 |               | Week 3                                                    |      | Week 4                                                    |      | Week 5                                                                     |      | Week 6                                                                                         |      | Week 7                                                                                         |      | Week 8                                                                                                  |      |
|-------------------------------------------------------------------------------|------------------------------------------------------------------------|------|------------------------------------------------------------------------|---------------|-----------------------------------------------------------|------|-----------------------------------------------------------|------|----------------------------------------------------------------------------|------|------------------------------------------------------------------------------------------------|------|------------------------------------------------------------------------------------------------|------|---------------------------------------------------------------------------------------------------------|------|
| <b>Warm up</b>                                                                | sets                                                                   | reps | sets                                                                   | reps          | sets                                                      | reps | sets                                                      | reps | sets                                                                       | reps | sets                                                                                           | reps | sets                                                                                           | reps | sets                                                                                                    | reps |
| Cat/camel                                                                     | 1                                                                      | 6    | 1                                                                      | 6             | 1                                                         | 6    | 1                                                         | 6    | 1                                                                          | 6    | 1                                                                                              | 6    | 1                                                                                              | 6    | 1                                                                                                       | 6    |
| Activation of core musculature                                                |                                                                        |      |                                                                        |               |                                                           |      |                                                           |      |                                                                            |      |                                                                                                |      |                                                                                                |      |                                                                                                         |      |
| - Supine                                                                      | 2                                                                      | 15   | 2                                                                      | 15            | 2                                                         | 15   | 2                                                         | 15   | 2                                                                          | 15   | 2                                                                                              | 15   | 2                                                                                              | 15   | 2                                                                                                       | 15   |
| - Quadruped                                                                   | 2                                                                      | 15   | 2                                                                      | 15            | 2                                                         | 15   | 2                                                         | 15   | 2                                                                          | 15   | 2                                                                                              | 15   | 2                                                                                              | 15   | 2                                                                                                       | 15   |
| - Side bridge (on knees)                                                      | 1<br>(10s holds)                                                       | 6    | 1<br>(10s holds)                                                       | 6 (10s holds) | 1<br>(10s holds)                                          | 6    | 1<br>(10s holds)                                          | 6    | 1<br>(10s holds)                                                           | 6    | 1<br>(10s holds)                                                                               | 6    | 1<br>(10s holds)                                                                               | 6    | 1<br>(10s holds)                                                                                        | 6    |
| <b>Dead bug</b>                                                               |                                                                        |      |                                                                        |               |                                                           |      |                                                           |      |                                                                            |      |                                                                                                |      |                                                                                                |      |                                                                                                         |      |
| Supine position                                                               | Supported position, extend 1 arm and flex opposite knee and hip to 90° |      | Supported position, extend both arms over head                         |               | Supported position, hands clasped, extend arms over head  |      | Supported position, hands clasped, extend arms over head  |      | Unsupported position, hands clasped, extend arms over head, extend 1 leg   |      | Unsupported position, hands clasped, extend arms overhead, extend both legs                    |      | Unsupported position, hands clasped, extend arms overhead, extend both legs                    |      | Unsupported position, extend opposite arm and opposite leg                                              |      |
| Supported position - knees bent and feet placed on floor                      |                                                                        |      |                                                                        |               |                                                           |      |                                                           |      |                                                                            |      |                                                                                                |      |                                                                                                |      |                                                                                                         |      |
| Unsupported position - feet raised from floor with knees and hips bent at 90° |                                                                        |      |                                                                        |               |                                                           |      |                                                           |      |                                                                            |      |                                                                                                |      |                                                                                                |      |                                                                                                         |      |
| Hold time                                                                     | 2s                                                                     |      | 2s                                                                     |               | 2s                                                        |      | 2s                                                        |      | 2s                                                                         |      | 2s                                                                                             |      | 2s                                                                                             |      | 2s                                                                                                      |      |
| Duration                                                                      | 30s                                                                    |      | 45s                                                                    |               | 60s                                                       |      | 60s                                                       |      | 75s                                                                        |      | 90s                                                                                            |      | 90s                                                                                            |      | 105s                                                                                                    |      |
| <b>Side bridging</b>                                                          |                                                                        |      |                                                                        |               |                                                           |      |                                                           |      |                                                                            |      |                                                                                                |      |                                                                                                |      |                                                                                                         |      |
| On side, forearm on floor, elbow under shoulder                               | Raise hips 3cm off floor with knees bent at 90°                        |      | Raise hips 8 cm off floor (max bridging height) with knees bent at 90° |               | Raise hips 8 cm off floor (max height) with legs straight |      | Raise hips 8 cm off floor (max height) with legs straight |      | Raise hips 8 cm off floor (max height) with legs straight and extend 1 leg |      | Raise hips 8 cm off floor (max height) with legs straight and extend 1 leg, add 0.5kgs to legs |      | Raise hips 8 cm off floor (max height) with legs straight and extend 1 leg, add 0.5kgs to legs |      | Raise hips 8 cm off floor (max height) after each side bridge hold, “roll” from one elbow to the other. |      |
| Sets                                                                          | 3 each side                                                            |      | 3 each side                                                            |               | 3 each side                                               |      | 3 each side                                               |      | 3 each side                                                                |      | 3 each side                                                                                    |      | 3 each side                                                                                    |      | 3 each side                                                                                             |      |
| Duration                                                                      | 30s                                                                    |      | 45s                                                                    |               | 20s                                                       |      | 30s                                                       |      | 30s                                                                        |      | 20s                                                                                            |      | 30s                                                                                            |      | 60s                                                                                                     |      |

|                                                                                   |                                                                                 |                                                            |                                                    |                                                                                             |                                                                                             |                                                           |                                                           |                                                         |
|-----------------------------------------------------------------------------------|---------------------------------------------------------------------------------|------------------------------------------------------------|----------------------------------------------------|---------------------------------------------------------------------------------------------|---------------------------------------------------------------------------------------------|-----------------------------------------------------------|-----------------------------------------------------------|---------------------------------------------------------|
| <b>Bird dog exercises</b><br><br>In quadruped position (four point kneeling)      | Raise one leg at a time, repeat with other leg then, raising each arm at a time | Raise opposite arm and opposite leg                        | Raise opposite arm and opposite leg                | Raise opposite arm and opposite leg, refrain from placing limbs back on ground between sets | Raise opposite arm and opposite leg, refrain from placing limbs back on ground between sets | Raise opposite arm and opposite leg, add 0.5kg leg weight | Raise opposite arm and opposite leg, add 0.5kg leg weight | Raise opposite arm and opposite leg, add 1kg leg weight |
| Sets                                                                              | 3 on each limb                                                                  | 3 on each side                                             | 3 on each side                                     | 3 on each side                                                                              | 3 on each side                                                                              | 3 on each side                                            | 3 on each side                                            | 3 on each side                                          |
| Duration                                                                          | 20s                                                                             | 20s                                                        | 30s                                                | 15s                                                                                         | 20s                                                                                         | 20s                                                       | 30s                                                       | 30s                                                     |
| <b>Hip abduction</b><br><br>Lying on side, core muscles activated, legs extended. | Raise and lower top leg.                                                        | Raise and lower top leg.                                   | Raise and lower top leg.                           | Raise and lower top leg.                                                                    | Raise and lower top leg.                                                                    | Raise and lower top leg with 0.5kg leg weight             | Raise and lower top leg with 0.5kg leg weight             | Raise and lower top leg with 1kg leg weight             |
| Sets                                                                              | 2 each side                                                                     | 3 each side                                                | 2 each side                                        | 3 each side                                                                                 | 3 each side                                                                                 | 2 each side                                               | 3 each side                                               | 3 each side                                             |
| Reps                                                                              | 10                                                                              | 10                                                         | 15                                                 | 15                                                                                          | 15                                                                                          | 15                                                        | 15                                                        | 15                                                      |
| <b>Stability ball exercises</b>                                                   | Seated on stability ball while activating core musculature                      | Seated on stability ball while activating core musculature | Squat with stability ball 90° hip and knee flexion | Squat with stability ball 90° hip and knee flexion                                          | Diagonal curls on stability ball                                                            | Diagonal curls on stability ball                          | Twists on stability ball holding a medicine ball          | Twists on stability ball with theraband                 |
| Sets                                                                              | 3                                                                               | 3                                                          | 3                                                  | 3                                                                                           | 3                                                                                           | 3                                                         | 3                                                         | 3                                                       |
|                                                                                   | Duration 30s                                                                    | Duration 30s                                               | Reps 15                                            | Reps 15                                                                                     | Reps 10                                                                                     | Reps 15                                                   | Reps 10                                                   | Reps 10                                                 |
| <b>Lunges/obliques</b>                                                            | Lunges with 2kg weight in each hand                                             | Lunges with 2kg weight in each hand                        | Lunges at 45°                                      | Lunges at 45° with a 2kg weight in each hand                                                | Lunges to sides                                                                             | Lunges to sides with 2kg weights in each hand             | Oblique pulley twist with theraband                       | Oblique pulley twist with theraband                     |
| Sets                                                                              | 3                                                                               | 3                                                          | 3                                                  | 3                                                                                           | 3                                                                                           | 3                                                         | 3                                                         | 3                                                       |
| Reps                                                                              | 10                                                                              | 10                                                         | 15                                                 | 10                                                                                          | 15                                                                                          | 10                                                        | 10                                                        | 15                                                      |

(1, 14-20)
